# Supplementary material
Source: publisher site journal article supplement (https://www.dovepress.com/article/282829)
Supplement: Supplementary file 1 [file get_supplementary_file.php]

Supplementary Table 1 Pre- and Post-EBV physiological and parasternal thickness by participant

| **Pre** | | | | | | | | | | | **Post** | | | | | | | | | |
| --- | --- | --- | --- | --- | --- | --- | --- | --- | --- | --- | --- | --- | --- | --- | --- | --- | --- | --- | --- | --- |
|  | **FEV1**  **(%)** | **RV**  **(%)** | **Rx**  **IC2**  **(mm)** | **Rx IC2 dens** | **Non-Rx IC2**  **(mm)** | **Non-Rx IC2 dens** | **SGRQ** | **Rx CT Vol**  **(mL)** | **Non-Rx CT vol**  **(mL)** | **TL vol**  **(mL)** | **FEV1**  **(%)** | **RV**  **(%)** | **Rx**  **IC2**  **(mm)** | **Rx IC2 dens** | **Non-Rx IC2**  **(mm)** | **Non-Rx IC2 dens** | **SGRQ** | **Rx CT Vol**  **(mL)** | **Non-Rx CT vol**  **(mL)** | **TL vol**  **(mL)** |
| 1 | 1 (34) | 4.5 (169) | 4.44 | 132.2 | 4.18 | 163.5 | 42.6 | 3825 | 3635 | 1507 | 0.9 (32) | 4.07 (150) | 7.37 | 186.1 | 5.14 | 214.5 | 44.12 | 3342 | 3648 | 871 |
| 2 | 0.5 (19) | 7.6 (271) | 3.22 | 215.3 | 7.91 | 143.6 | 70.16 | 3698 | 3177 | 2379 | 0.82 (33) | 5.11 (180) | 9.99 | 173.7 | 3.07 | 190.1 | 48.07 | 2102 | 3272 | 271 |
| 3 | 1.1 (32) | 5 (175) | 9.12 | 185.4 | 5.52 | 168.2 | 64.48 | 4041 | 3656 | 2491 | 1.22 (35) | 5.06 (176) | 7.68 | 185.9 | 8.72 | 148.1 | 60.48 | 3894 | 3640 | 1750 |
| 4 | 1.5 (44) | 5.2 (193) | 5.19 | 200.3 | 4.74 | 186.8 | 60.61 | 3296 | 2883 | 2079 | 1.39 (41) | 5.5 (203) | 4.73 | 179.3 | 7.21 | 191.4 | 84.60 | 3780 | 3654 | 1960 |
| 5 | 1.3 (46) | 4.5 (177) | 5.95 | 164.4 | 5.55 | 126.7 | 63.5 | 3708 | 3823 | 2388 | 1.21 (43) | 4.63 (182) | 3.05 | 111.2 | 5.43 | 168.7 | 46.19 | 3175 | 3771 | 1774 |
| 6 | 0.8 (53) | 3.98 (191) | 4.95 | 163.1 | 5.75 | 133 | XX | 2403 | 2324 | 1462 | 1.21 (80) | 2.83 (136) | 5.99 | 156.5 | 4.75 | 163.5 | XX | 1721 | 2431 | 411.5 |
| 7 | 1.4 (43) | 4.63 (175) | 6.73 | 167.7 | 4.47 | 154.9 | 63.02 | 3215 | 2836 | 2493 | 1.76 (55) | 4.18 (157) | 7.47 | 176.3 | 5.48 | 163.3 | 32.33 | 2545 | 2956 | 1396 |
| 8 | 0.58 (19) | 6.59 (261) | 5.15 | 174.6 | 4.95 | 176.2 | 64.39 | 4613 | 3921 | 2345 | 0.57 (19) | 6.51 (258) | 5.28 | 178.9 | 10.23 | 161.8 | 69.70 | 3347 | 4335 | 1614 |

FEV1 (%): Forced expiratory volume (litres) in 1 second (% predicted)

RV: Residual volume (litres) (% predicted)

Rx IC2: 2nd parasternal intercostal ultrasound thickness treated hemithorax

Rx IC2 dens: 2nd parasternal intercostal mean grayscale density measurement treated hemithorax

Non-Rx IC2: 2nd parasternal intercostal ultrasound thickness non-treated hemithorax

Non-Rx IC2 dens: 2nd parasternal intercostal ultrasound mean grayscale density measurement non-treated hemithorax

SGRQ: St George’s Respiratory Questionnaire

Rx CT vol: CT-lung volume treated hemithorax

Non-RX CT vol: CT-lung volume non-treated hemithorax

TL vol = EBV-target lobe CT-volume

Supplement Table 2 Changes between pre- and post-EBV insertion by participant

|  | **Delta FEV1**  **(litres)** | **Delta RV**  **(litres)** | **Delta Rx CT vol**  **(mL)** | **Delta Non-Rx CT vol (mL)** | **Delta target lobe vol (mL)** | **Delta SGRQ** | **Delta Rx IC2**  **(mm)** | **Delta Non-Rx IC2 (mm)** | **Delta Rx IC2**  **dens** | **Delta Non-RX IC2 dens** | **Delta diaph thick (mm)** | **Delta diaph**  **excur (mm)** |
| --- | --- | --- | --- | --- | --- | --- | --- | --- | --- | --- | --- | --- |
| 1 | -0.1 | -0.43 | -482.5 | 12.7 | -636 | 1.52 | 2.928 | 0.9675 | 53.85 | 0.9675 | -0.016 | 15.1695 |
| 2 | 0.32 | -2.49 | -1956 | 95.6 | -2108 | -22.09 | 6.7685 | -4.8405 | -41.55 | -4.84 | 0.3495 | 19.231 |
| 3 | 0.12 | 0.06 | -147.2 | -15.6 | -741 | -4 | -1.4385 | 3.193 | 0.5 | 3.19 | -1.7495 | -17.015 |
| 4 | -0.11 | 0.3 | 484 | 771 | -119 | 23.99 | -0.4645 | 2.471 | -21 | 2.47 | -1.5155 | 16.478 |
| 5 | -0.09 | 0.13 | -533 | -51.92 | -614 | -17.31 | -2.9055 | -0.119 | -53.2 | -0.12 | -1.5325 | -18.015 |
| 6 | 0.41 | -1.15 | -683.18 | 106.78 | -1050.5 | XXX | 1.043 | -1.0055 | -6.6 | -1 | -0.857 | 9.8125 |
| 7 | 0.36 | -0.45 | -670 | 120 | -1097 | -30.69 | 0.7415 | 1.0105 | 8.65 | 1.01 | 0.5195 | -41.4045 |
| 8 | -0.01 | -0.08 | -1266 | 414 | -731 | 5.31 | 0.1215 | 5.2765 | 4.25 | 5.28 | -1.315 | 11.6635 |

FEV1: Forced expiratory volume in 1 second

RV: Residual volume

Rx IC2: 2nd parasternal intercostal ultrasound thickness treated hemithorax

Rx IC2 dens: 2nd parasternal intercostal mean grayscale density measurement treated hemithorax

Non-Rx IC2: 2nd parasternal intercostal ultrasound thickness non-treated hemithorax

Non-Rx IC2 dens: 2nd parasternal intercostal ultrasound mean grayscale density measurement non-treated hemithorax

SGRQ: St George’s Respiratory Questionnaire

Rx CT vol: CT-lung volume treated hemithorax

Non-RX CT vol: CT-lung volume non-treated hemithorax

TL vol = EBV-target lobe CT-volume

Diaph thick: Diaphragm thickness

Diaph exurs: Diaphragm excursion
